# Supplementary material
Source: Springer Nature journal article supplement (https://www.springermedizin.de/resource/supplementary/12913_2013_3028_MOESM3_ESM.pdf/9533316)

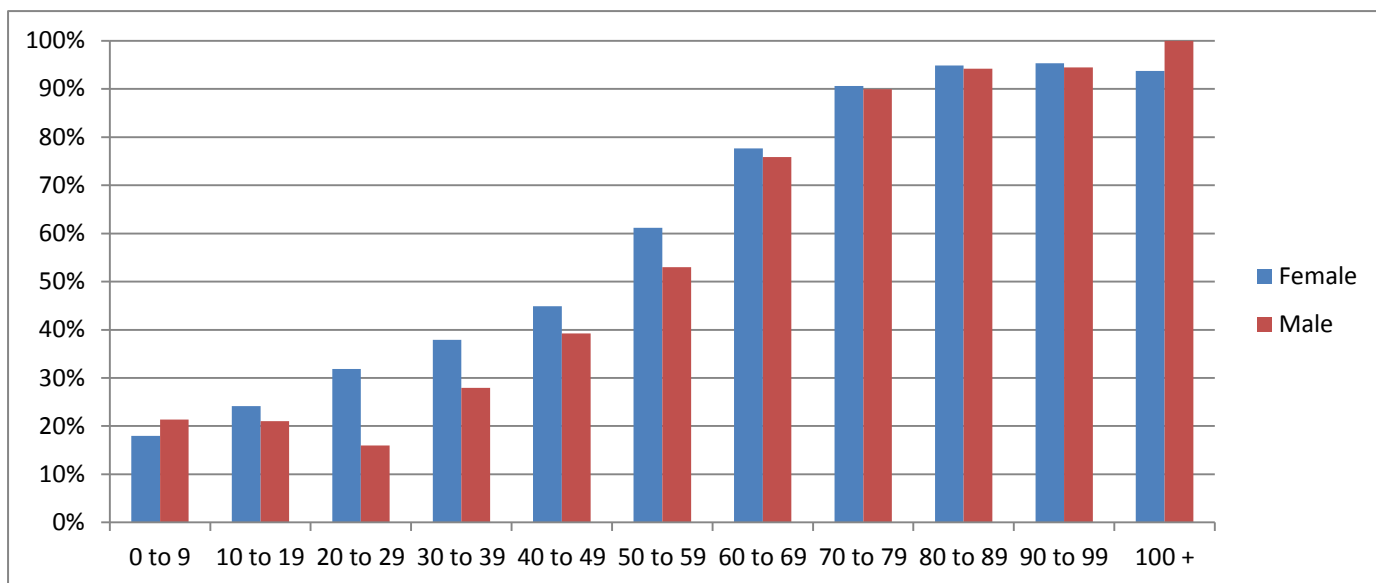

Figure 1: The percentage of patients receiving at least one repeat prescription, by age and sex.

Supplement: MOESM3 [file 9533316]
